# Supplementary material
Source: bioRxiv or medRxiv preprint supplement (https://medrxiv.org/highwire/filestream/94352/field_highwire_adjunct_files/3/2020.08.24.20180745-4.pdf)
Supplement: Supplementary file [file 2020.08.24.20180745-4.pdf]

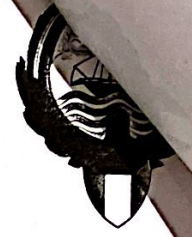

المرجع : .....

التاريخ : .....

لذلك ووفقاً لما سبق فإننا نوصى بالموافقة على إجراء البحث باستخدام الاستبيان لجمع البيانات من المستهدفين بالدراسة دون أخذ أي عينات حيوية أو إعطاء أدوية أو إجراء تجارب طبية أو إجراء أي فحوصات للمرضى مع الالتزام بصون الخصوصية والمحافظة على سرية المعلومات وعدم تداولها أو نشرها خارج إطار البحث إلا بعد الحصول على موافقة الوزارة.

ونأمل التفضل بالموافقة على اعتماد التوصية ومخاطبة الجهات ذات الصلة بموضوع البحث (السيد/ د. الوكيل المساعد للشئون الفنية – السيد / د. أمين عام معهد الكويت للاختصاصات الطبية KIMS – السيدة / د. مدير منطقة العاصمة الصحية – السيدة / د. رئيس كلية الرعاية الصحية الأولية / معهد الكويت للاختصاصات الطبية KIMS - السيد / مدير إدارة نظم المعلومات) (مدة إجراء البحث 6 شهور) لتسهيل مهمة الباحثين لإجراء البحث رقم (2020/1409) ووفقاً لما سبق مع الالتزام بالضوابط المتعلقة بصون الخصوصية والمحافظة على سرية المعلومات المتعلقة بالمشاركين بالبحث ودون أي التزامات على الوزارة.

وتفضلوا بقبول فائق التحية والاحترام ،،،

الدكتور / محمد جاسم الخشتي  
وكيل الوزارة المساعد لشئون التخطيط والجودة  
رئيس اللجنة الدائمة لتنسيق البحوث الطبية والصحية

محمد جاسم الخشتي  
وكيل الوزارة المساعد لشئون  
التخطيط والجودة

يعتمد ،،،

وكيل الوزارة

محمد جاسم الخشتي  
وكيل الوزارة المساعد لشئون  
التخطيط والجودة

الوكيل المساعد لشئون التخطيط والجودة  
الصادر: ٩  
الرقم: ٥٠٠  
التاريخ: ٦/٤/٢٠٢٠

المرجع : \_\_\_\_\_

التاريخ : \_\_\_\_\_

المحترم

السيد الفاضل / وكيل الوزارة

تحية طيبة وبعد،،،

الموضوع : تسهيل مهمة الباحثين / د. لولوه العسوسى - د. سارة العبد الهادى -  
د. سارة الحمورى (كلية الرعاية الصحية الأولية / معهد الكويت للاختصاصات

الطبية KIMS)

لإجراء البحث رقم (2020/1409) تحت عنوان :

Anxiety and Media Exposure During COVID-19 out Break in  
Kuwait

بالإشارة إلى الكتاب المعتمد من السيدة / د. رئيس كلية الرعاية الصحية الأولية / معهد الكويت للاختصاصات الطبية KIMS بتاريخ 2020/4/6 ، والمرفق به طلب الموافقة على إجراء البحث رقم (2020/1409) ، والتفويض الممنوح من اللجنة الدائمة لتنسيق البحوث الطبية والصحية المشكلة بموجب القرار الوزاري رقم 207 لسنة 2012 والقرارات المكملة والمعدلة له للسيد / رئيس اللجنة بشأن البت في طلبات البحوث التي لا تتضمن أي تداخلات أو فحوصات أو إعطاء أدوية أو أخذ عينات حيوية من المرضى.

وبعد دراسة طلب إجراء البحث وما تضمنه الكتاب المشار إليه وبروتوكول ونماذج البحث ونموذج الموافقة المستنيرة والمرفقات بشأن تعهد الباحثين بالالتزام بإتخاذ كافة الإجراءات لضمان خصوصية المشاركين بالدراسة وسرية المعلومات المتعلقة بهم والالتزام بعدم تداول أي من المعلومات أو نشرها دون الرجوع للوزارة. وحيث أن البحث يتم من خلال إستخدام إستبيان يتم توزيعه إلكترونياً لجمع البيانات واستخلاص المؤشرات من الفئات المستهدفة بالدراسة حسب بروتوكول البحث دون كتابة أسماء المشاركين بالدراسة أو ما قد يدل على شخصياتهم.

السيد / د. لولوه العسوسى
